# Supplementary material for: A multifunctional CuSCN interlayer in carbon electrode-based CsPbIBr2 all-inorganic perovskite solar cells for boosting the efficiency and stability
Source: Royal Society of Chemistry journal article supplement (doi:10.1039/d0se00479k), 2020-01-01
Supplement: d0se00479k1.pdf [file d0se00479k1.pdf]

Electronic supplementary Information

Multifunctional CuSCN interlayer in carbon electrode-based CsPbIBr<sub>2</sub> all-inorganic  
perovskite solar cells for boosting the efficiency and stability

Jieqiong Liu, Miao Lei, Wei Zhang, Guiqiang Wang\*

School of New Energy, Bohai University, 121007 Jinzhou, China

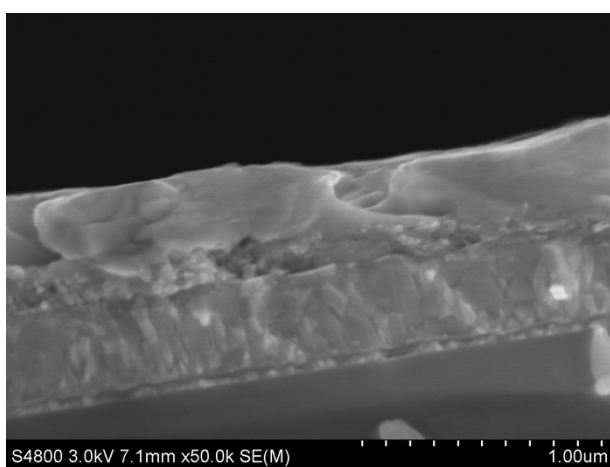

Fig. S1 The cross-sectional SEM image of FTO/TiO<sub>2</sub>/CsPbIBr<sub>2</sub>/CuSCN

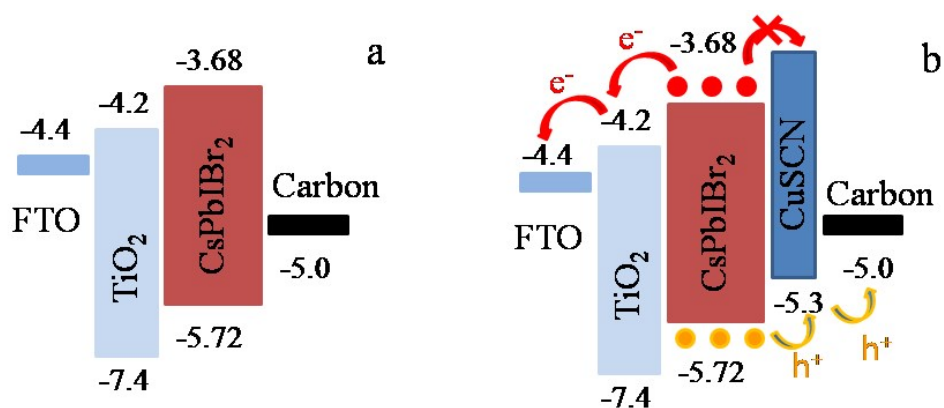

Fig. S2 The energy level diagrams of carbon electrode-based CsPbIBr<sub>2</sub> PSCs without  
(a) and with (b) CuSCN interlayer

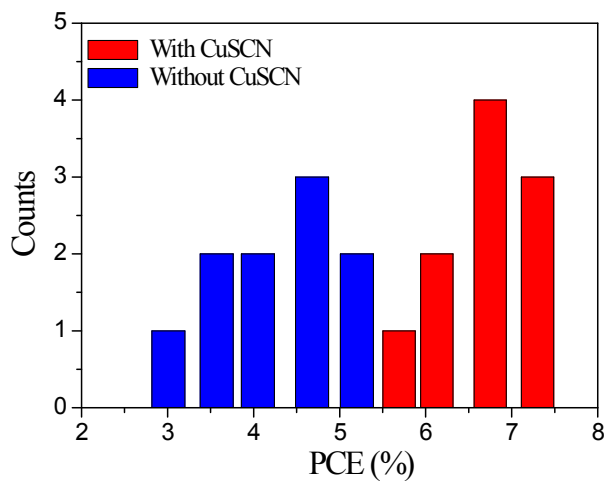

Fig. S3 The statistic histograms of PCE for the CsPbIBr<sub>2</sub> PSCs with and without CuSCN interlayer

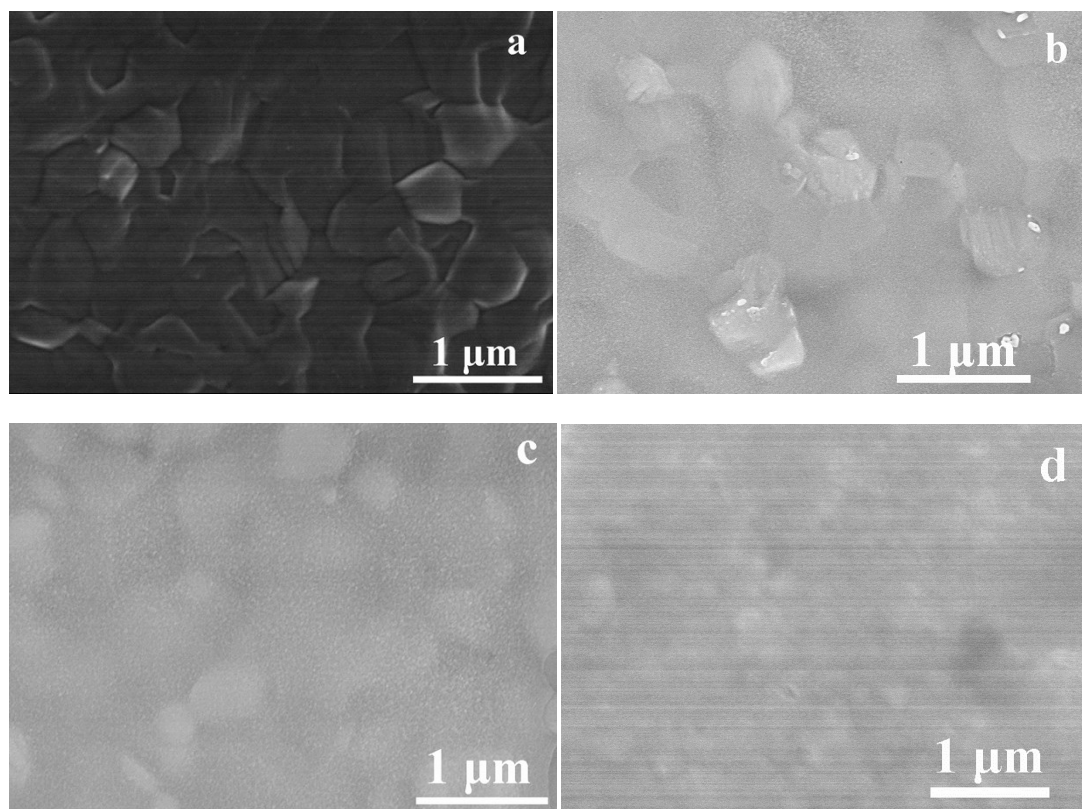

Fig. S4 Top-view SEM images of CsPbIBr<sub>2</sub> film with CuSCN overlayer formed at different concentration (a: 0 mg mL<sup>-1</sup>, b: 10 mg mL<sup>-1</sup>, c: 20 mg mL<sup>-1</sup>, d: 30 mg mL<sup>-1</sup>)

Table S1 Photovoltaic parameters of carbon electrode-based CsPbIBr<sub>2</sub> all-inorganic PSCs with CuSCN interlayer obtained at different concentrations.

| CuSCN concentration    | V <sub>oc</sub> (V) | J <sub>sc</sub> (mA cm <sup>-2</sup> ) | FF   | η (%) |
|------------------------|---------------------|----------------------------------------|------|-------|
| 0 mg mL <sup>-1</sup>  | 1.06                | 10.01                                  | 0.49 | 5.19  |
| 10 mg mL <sup>-1</sup> | 1.10                | 9.78                                   | 0.49 | 5.27  |
| 20 mg mL <sup>-1</sup> | 1.13                | 10.43                                  | 0.62 | 7.30  |
| 30 mg mL <sup>-1</sup> | 1.12                | 10.22                                  | 0.56 | 6.41  |

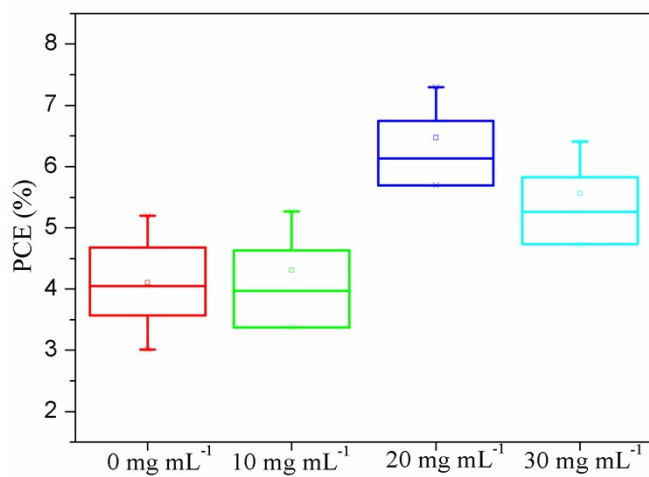

Fig. S5 Box charts of PCE of the CsPbIBr<sub>2</sub> PSCs with CuSCN interlayer obtained from different concentration

Table S2 Photovoltaic parameters of carbon electrode-based CsPbIBr<sub>2</sub> all-inorganic PSCs with and without CuSCN interlayer under forward and reverse scans

| Devices       |         | V <sub>oc</sub> (V) | J <sub>sc</sub> (mA cm <sup>-2</sup> ) | FF   | η (%) |
|---------------|---------|---------------------|----------------------------------------|------|-------|
| With CuSCN    | Forward | 1.12                | 10.31                                  | 0.56 | 6.46  |
|               | Reverse | 1.13                | 10.42                                  | 0.62 | 7.30  |
| Without CuSCN | Forward | 0.93                | 9.66                                   | 0.33 | 2.97  |
|               | Reverse | 1.06                | 10.01                                  | 0.49 | 5.19  |
